# Supplementary material for: WeChat-based mHealth intention and preferences among people living with schizophrenia
Source: PeerJ. 2020 Dec 16;8:e10550. doi: 10.7717/peerj.10550 (PMC7749651; doi:10.7717/peerj.10550)
Supplement: Supplemental Information 1 [file peerj-08-10550-s001.xlsx]

## Sheet: dataset
agecat1	sex	marriage1	education1	work1	wpsy	wpeer	wprof	tdiasbility	BST	GAF	wintention	nintention
2	2	3	2	0				40	51	50	0
3	2	2	1	0				17	76	30	0
2	1	2	1	0				56	60	50	0
1	1	2	2	0				51	61	30	0
3	1	2	2	0	1	0	0	20	39	30	1	1
0	2	2	2	0	0	0	1	14	28	70	1	1
0	2	1	2	1	1	0	0	18	32	60	1	1
2	1	2	2	0	0	1	0	29	51	50	1	1
0	1	1	2	1				30	41	70	0
1	1	1	2	0				38	35	50	0
0	2	1	3	1	1	1	1	12	20	80	1	3
3	2	2	1	0				46	63	20	0
1	2	2	2	0				16	48	60	0
3	1	2	2	0	1	1	1	19	43	70	1	3
1	2	2	1	0	0	1	0	21	34	80	1	1
2	1	2	2	0				16	41	60	0
0	2	2	3	0	1	1	1	34	58	50	1	3
1	2	2	2	1	0	1	1	27	51	50	1	2
2	1	2	2	1	1	0	1	16	21	80	1	2
2	1	2	1	0				16	21		0
1	2	2	2	0				27	29	60	0
2	1	3	2	0				21	29	80	0
2	1	2	2	0					54	60	0
0	2	2	2	0					43	50	0
1	1	1	2	0	1	1	1	28	52	50	1	3
3	1	2	1	0				23	33	60	0
1	2	2	1	0				25	44	50	0
0	2	2	2	0	0	1	0	42	44	40	1	1
1	2	2	2	0				21	31	80	0
1	1	1	1	0				39	31	60	0
0	2	2	1	0				48	33	30	0
0	2	2	2	0				37	37	60	0
1	1	1	1	0				20	50	50	0
2	2	2	1	0				26	27	80	0
0	2	2	2	0				12	34	60	0
1	2	2	1	0	1	1	0	38	49	40	1	2
1	2	2	2	0	1	0	1	24	37	80	1	2
0	2	2	1	0	0	0	1	23	23	70	1	1
2	1	2	2	0	0	0	1	13	22	80	1	1
1	2	2	2	0				34	43	60	0
2	2	2	2	0				18	34	70	0
1	2	2	1	0				22	45	40	0
1	2	3	2	0				21			0
2	2	1	2	0				12	37	70	0
1	2	2	2	0	1	1	1	13	23	80	1	3
0	1	2	2	0	1	1	1	14			1	3
0	1	1	2	0				33	34	40	0
1	2	3	2	0				42			0
3	2	3	2	0				29	36	60	0
2	1	2	3	0				32			0
3	1	1	2	0				31	54	50	0
3	2	3	2	0				33	39	60	0
2	2	2	2	0				21	32	60	0
2	1	1	1	0				24			0
2	1	2	1	0				27	31	60	0
2	2	1	2	0				22			0
2	1	1	2	0				39	49	50	0
1	1	1	2	0				50			0
0	2	1	2	0				31			0
1	1	1	2	0				25	40	50	0
0	1	1	2	0				16	35	60	0
0	1	1	2	0				14	27	80	0
3	1	1	2	0				36	50	50	0
1	1	1	3	0				13	26	60	0
1	1	2	2	0	1	0	0	21	37	60	1	1
3	2	2	2	0				28	24	80	0
2	2	3	3	0				14	29	70	0
3	2	2	2	0				37	52	50	0
1	1	1	2	0				32	40	40	0
2	2	3	2	0	1	0	0	13	23	80	1	1
2	1	3	3	0	1	0	0	17	33	70	1	1
1	1	1	2	0	1	0	0	12	25	80	1	1
0	1	1	2	0	1	0	0	25	31	60	1	1
1	1	3	2	0	1	0	1	39	36	60	1	2
1	2	1	3	0	1	0	1	31	33	60	1	2
1	1	1	2	0	0	1	0				1	1
2	2	1	2	0	0	0	1	40	51	50	1	1
1	1	1	2	0	0	0	1	26	20	80	1	1
1	2	3	2	0	0	0	1	40			1	1
1	1	1	1	0				21	21	70	0
1	2	2	2	0	1	1	0	15	31	70	1	2
1	1	1	2	0	1	1	0	21	38	60	1	2
1	2	2	2	0	1	1	1	18	18	60	1	3
2	2	3	2	0	1	1	1	17	30	60	1	3
1	2	3	2	1	1	0	1	12	24	80	1	2
0	1	1	1	0	0	1	0	27	30	60	1	1
2	1	2	2	0	0	1	1	31	25	80	1	2
2	1	3	2	1				13	19	60	0
2	2	2	2	0				30	33	70	0
2	2	3	2	0				16	22	70	0
2	1	2	2	0				14	24	80	0
2	2	2	2	0				26	44	60	0
3	2	3	2	0				33	42	70	0
2	1	2	1	0				34	38	60	0
2	1	1	2	0				21	32	60	0
2	1	3	2	0				45	84	50	0
1	2	1	3	0				36			0
2	1	3	2	1	1	1	1	16	27	70	1	3
0	1	1	3	0	1	1	1	34	39	70	1	3
3	1	2	2	0	1	1	1	30	30	50	1	3
3	1	2	3	0	1	1	1	31	68	60	1	3
2	2	2	3	0	1	1	1	13	28	80	1	3
1	1	1	2	0	1	1	1	36			1	3
1	2	1	2	0	1	1	1	24	31	70	1	3
0	2	1	2	0	1	1	1	19			1	3
2	1	1	3	0	1	1	1	19	39		1	3
2	2	3	3	0	1	0	1	20	37	70	1	2
1	1	1	2	0	1	1	1	25	35	60	1	3
1	1	1	2	0	1	0	1	19	33	70	1	2
1	1	1	2	0	0	1	1	33	44	40	1	2
1	1	3	3	1	1	0	1	27	22	70	1	2
2	1	1	3	0				24	24	70	0
2	1	1	2	1	1	0	0	18	38	80	1	1
1	1	1	2	1	1	0	0	24	27	70	1	1
1	1	1	2	1	1	1	0	39	21	80	1	2
2	2	2	2	0	1	1	1	38	38	70	1	3
1	1	1	3	0				35	26	70	0
2	2	3	1	0				45	26	70	0
0	1	1	2	0	1	0	0	31	38	50	1	1
0	1	1	2	0	1	1	1	18			1	3
1	1	2	3	0	0	1	1	14	29	80	1	2
1	1	1	2	1	1	0	1	18	25	90	1	2
2	2	2	2	0	1	0	1		24	80	1	2
1	1	2	2	1				26	40	70	0
2	1	2	2	0				19	24	70	0
2	2	2	2	0				18	36		0
0	1	1	1	0				15	52	50	0
0	1	1	1	0				32	51	30	0
1	2	1	2	0				38			0
2	1	2	2	0				33	22	70	0
3	2	2	2	0	0	1	1	14	34	80	1	2
0	2	2	2	1	0	0	1	14	18	90	1	1
1	2	2	2	0				29	45	60	0
3	2	2	2	0				33	34	70	0
2	1	2	2	1				12	19	80	0
2	2	2	2	0				38	44	60	0
1	2	2	2	0				26			0
1	1	1	1	0	1	0	0	12	43	40	1	1
1	1	1	2	0	1	0	0	14	31	70	1	1
1	1	1	2	0	1	1	1	42	42	50	1	3
1	1	1	3	0	0	1	0	34			1	1
2	1	1	3	0	1	1	0	22	25	80	1	2
2	2	2	3	0	1	0	1	12	21		1	2
3	1	2	1	0				25	41	60	0
2	1	1	1	0				46			0
1	1	1	3	0				14	19	70	0
1	1	1	3	1	1	1	1	12	19	80	1	3
1	2	1	2	0	1	1	1	26	31	60	1	3
2	1	3	2	0				40	41	60	0
2	1	2	2	0	1	0	0	25	35	60	1	1
2	2	2	2	1	0	0	1	17	23	80	1	1
3	2	2	1	0	1	0	0	21			1	1
0	2	1	3	0	0	0	1	25	40	50	1	1
2	2	3	2	0				25			0
1	1	3	2	0				41	32	70	0
2	2	1	1	0				21	21	70	0
2	2	2	2	0				17	24	70	0
2	2	1	2	0				19	20	50	0
2	1	2	2	0				59	32	60	0
2	2	3	2	0				42	20	70	0
1	2	2	2	0				27	32	60	0
2	2	2	2	0				38	21	70	0
2	1	2	2	0	1	0	0	22	24	60	1	1
2	1	3	1	0				38	20	60	0
0	2	2	2	0	0	0	1	14	20	70	1	1
2	1	2	1	0				32	48	50	0
2	2	3	1	0				21	23	80	0
0	2	1	2	0				14	24	60	0
2	2	2	2	0				27	32	60	0
1	2	3	2	0				31	24	60	0
1	1	1	2	0				20	30	70	0
0	1	1	2	1	1	0	0	16	19	70	1	1
2	1	2	2	0	1	0	0	15	20	60	1	1
0	1	1	3	0	1	0	0	35	21	70	1	1
1	2	2	1	0	1	0	0	18	33	60	1	1
0	2	2	2	0	1	0	1	27	22	60	1	2
2	2	2	1	1				18	20	70	0
0	1	1	2	0	1	1	0	24	22	70	1	2
2	1	2	2	0	0	1	1	13	21	60	1	2
0	2	2	1	0				23	24	60	0
3	1	2	2	0				14	20	60	0
1	2	2	2	0	0	1	1	30	22	60	1	2
1	2	2	2	0	1	0	0	31	27	60	1	1
1	2	2	2	0	1	0	0	36	24	70	1	1
2	2	3	2	1	0	1	1	16	19	70	1	2
2	2	2	1	0	0	0	1	24	28	60	1	1
2	1	1	1	0				41	26	60	0
0	2	1	2	0	1	0	0	23	29	70	1	1
1	2	2	3	0					25	50	0
3	2	2	1	0				49	23	60	0
2	2	2	1	0				34			0
2	1	3	1	0				35	23	60	0
3	1	2	2	0				37			0
2	2	2	2	0				34	33	60	0
1	2	3	3	1				25	20	80	0
1	1	1	2	1				14	25	60	0
1	1	1	3	1				29	22	80	0
2	2	3	2	0				39	35	60	0
1	2	2	2	0				33	36	50	0
2	2	3	2	0				35	36	40	0
2	1	2	1	0							0
2	2	1	2	0	1	0	0	14	27	80	1	1
2	1	2	2	1	1	0	0				1	1
0	1	1	3	1	1	0	0	28	49	40	1	1
2	2	2	2	0	1	0	0	18	25	70	1	1
2	2	3	3	0	0	1	0	34	27	70	1	1
2	1	3	2	1				18	27	70	0
3	1	2	2	0				14	37	60	0
3	1	3	2	0				22	29	60	0
2	2	2	2	0	1	1	0	19			1	2
1	2	2	2	0	0	1	1	22	37	50	1	2
0	1	1	2	0	0	1	1	22	31	60	1	2
3	1	3	2	0				27	27	70	0
0	1	1	2	0	1	0	1	22	24	60	1	2
1	1	1	2	0				38	41	50	0
1	2	1	2	0	0	1	0	29	25	60	1	1
1	2	1	1	0				50	38	50	0
1	2	1	2	0				46	49	40	0
2	2	2	2	0				39	35	50	0
1	1	1	3	0				32	39	50	0
2	2	3	3	0				48	33	50	0
2	1	1	3	0	0	1	0	13			1	1
0	2	1	3	0	0	0	1	30	22	80	1	1
2	2	2	2	1				20	44	50	0
1	2	2	2	0				27	45	40	0
2	2	1	2	0				13	29	60	0
2	2	3	3	0				19	25	60	0
2	2	3	2	0				25	36	50	0
1	1	1	2	0				44	29	60	0
2	2	2	1	0				19	53	20	0
2	2	2	2	0				19			0
0	1	2	2	0				42	59	20	0
0	2	1	3	0				12	42	60	0
2	1	2	2	0				13	22	70	0
2	1	2	2	0	1	0	0				1	1
3	1	2	2	0	1	1	1	39	36	60	1	3
3	1	2	2	0	0	1	1	17	52	20	1	2
2	2	1	1	0				17	42	60	0
3	2	2	2	0				15	41	60	0
1	2	3	3	0				31	36	50	0
0	1	1	2	0							0
1	2	3	2	1	1	0	0	25	29	70	1	1
0	1	1	2	0	1	0	0	14	23	80	1	1
0	1	1	3	0	1	0	0	13	31	50	1	1
2	1	1	2	0	1	1	1	17	38	50	1	3
2	2	3	2	0	0	1	0	35			1	1
3	1	2	1	0	0	1	1	16	33	20	1	2
2	2	3	2	0	0	0	1	36	44		1	1
2	2	2	2	1				12	23	80	0
2	2	3	2	0				35	50	60	0
2	2	2	2	0				14	30	60	0
1	2	2	1	0	1	0	1	36	27	70	1	2
2	1	2	3	0	1	1	1	18	20	80	1	3
1	2	2	2	0	1	1	1	22	31	60	1	3
0	1	1	3	0	1	1	1	21	31	50	1	3
0	1	1	1	0	1	1	1	33	51	10	1	3
0	2	2	2	0				28	50	70	0
2	2	3	1	0				33	53	60	0
3	2	3	2	0				20	27	70	0
3	1	1	1	0				26	35	60	0
2	1	1	2	0				26	39	60	0
1	1	1	2	0				21	36	70	0
1	1	1	2	0				37	67	60	0
2	1	1	2	0				33	48	60	0
2	1	2	2	0				16	30	60	0
1	1	2	1	0				28	54	50	0
2	2	3	2	0				18	27	70	0
1	2	1	3	0	1	1	0	27	46	70	1	2
1	2	3	3	0	1	0	1	35	22	70	1	2
2	2	2	2	0	1	0	1	13	24	80	1	2
1	2	2	2	0	0	1	0	30	26	70	1	1
1	2	2	2	0	0	0	1	22	21	80	1	1
1	2	2	3	1	1	0	1	25	23	80	1	2
0	2	2	2	0	0	0	1	29			1	1
1	1	1	2	0				25	35	50	0
2	2	3	2	0				14	25	70	0
0	1	1	1	0	0	1	0	21	33	10	1	1
2	2	2	1	0				19	34	40	0
2	1	2	2	1					21	80	0
3	1	3	2	0				48	38	50	0
1	2	1	2	0				24	27	70	0
3	2	2	1	0				35	23	50	0
2	1	3	2	0				29	21	60	0
3	1	1	1	0	1	1	1	16			1	3
1	1	1	1	0				20	26	60	0
2	2	2	2	0	1	0	0	14	27	70	1	1
1	1	2	1	1	0	0	1	19			1	1
0	2	2	2	0	0	0	1	24	24	60	1	1
2	1	2	1	0				23	23	60	0
1	1	1	1	1				16	19	70	0
0	2	2	2	0	1	1	1	17	22	60	1	3
2	2	2	1	0	0	1	0	14	20	60	1	1
0	2	2	2	0	1	1	1	30	20	70	1	3
1	1	1	2	0	1	0	0	15	22	60	1	1
0	2	2	2	0	0	1	0	16	32	60	1	1
1	2	2	1	0	0	1	0	21	30	60	1	1
2	2	2	2	0				60	30	60	0
2	1	3	2	0	0	1	0	25	23	60	1	1
3	1	1	3	0				13	19	80	0
2	2	2	2	0	1	0	0	20	24	80	1	1
2	1	3	2	0				54	68	40	0
0	2	1	2	0				41	39	40	0
2	2	2	2	0				28	34	60	0
1	1	3	1	0				37	37	60	0
1	1	3	3	0				21			0
3	2	3	2	0	1	0	0	23	33	60	1	1
0	2	1	2	0	1	0	0	46	67	30	1	1
2	2	3	2	0	0	1	0	12	30	70	1	1
2	1	3	2	0				24	30	70	0
2	1	2	2	0				32	34	50	0
0	1	1	2	0	1	0	0	17			1	1
2	2	1	2	0	1	0	0	19	33	80	1	1
2	1	3	2	0	1	0	0	37	45	60	1	1
3	1	2	2	0	1	1	0	34	26	80	1	2
1	2	2	2	0	0	0	1	18	28	70	1	1
1	2	3	2	0	0	0	1	37	49	40	1	1
2	1	3	3	1				12	23	80	0
2	2	2	2	0				27	23	80	0
3	2	3	2	0				26	29	70	0
2	2	1	2	0				44	35	70	0
1	1	1	2	0				23	36	60	0
2	2	2	2	0	1	1	1	45	43	50	1	3
1	2	1	3	0	1	1	1	34	41	60	1	3
1	2	1	2	1	1	0	1	14	18	90	1	2
2	2	1	2	0				17	34	70	0
2	2	3	2	0	1	1	1	23	23	80	1	3
2	2	2	2	0	1	1	1	25	25		1	3
1	1	1	2	0	1	1	1	23	39	70	1	3
2	1	3	3	0	1	1	1	27	45	60	1	3
1	2	3	2	0	1	0	1	23	51	60	1	2
2	1	1	2	1	0	1	0	21	24	70	1	1
3	1	2	2	0				13	19	80	0
2	1	3	2	0				25	34	60	0
1	1	1	2	0	1	1	1	42	69	30	1	3
2	2	1	3	0	0	0	1	33	23	80	1	1
2	2	1	1	0				17	35	60	0
1	1	1	2	0				27	41	60	0
1	1	1	1	0				24	42	50	0
2	2	3	2	0				29	33	70	0
2	2	2	2	0	1	1	1	20	25	80	1	3
1	2	2	2	0	0	1	1	12	21	80	1	2
3	2	2	2	0				24	30	70	0
2	1	1	2	0				41	36	60	0
2	1	2	2	0				28	31	80	0
2	1	2	2	0				15	32	70	0
1	1	1	3	0				20	28	70	0
2	1	1	2	0					33	50	0
1	2	1	1	0				48	36	60	0
2	1	2	1	0				33	34	70	0
0	2	2	2	0	1	1	1	17	24	80	1	3
3	2	2	1	0				14	20	60	0
3	2	2	1	1				42	52	40	0
0	1	1	2	0	1	0	1	18	19	60	1	2
1	1	2	2	1	1	1	1	25	24	70	1	3
2	2	2	2	0	1	1	1	23	28	60	1	3
0	1	1	3	0	1	1	1	53	56	50	1	3
1	1	1	2	0	1	1	1	16	22	70	1	3
3	1	2	1	0				16	20	60	0
3	1	2	2	0				26	22	60	0
2	1	1	2	0				16	20	60	0
1	2	2	2	0	1	0	1	12	21	60	1	2
1	2	3	2	0				29	28	60	0
0	1	1	2	0	1	0	1	39	24	60	1	2
0	2	2	3	0				32	34	60	0
2	1	2	2	0	0	1	0	12	38	80	1	1
0	2	1	2	0				13	20	60	0
1	1	2	1	1				12	20	70	0
2	1	1	2	1				17	21	70	0
2	1	3	2	0				21	20	60	0
2	2	2	1	0				32	37	50	0
2	1	1	2	0				16	21	60	0
2	2	2	2	0				36	20	60	0
2	2	2	3	1				18	18		0
3	1	1	1	0				29	30	40	0
2	2	3	2	0				47			0
3	2	1	2	0				31	21	60	0
1	1	1	1	0				30	22	60	0
0	2	1	2	0				48	25	50	0
3	2	3	2	0				33			0
2	1	2	2	0	1	0	0	13	26	80	1	1
3	1	3	2	0				20	26	80	0
2	2	2	2	0				28	42	50	0
1	2	1	2	0				26	21	60	0
2	1	3	2	0				37	30	50	0
0	1	1	2	0	0	1	0	42	30	50	1	1
2	1	3	2	0				34	47	60	0
2	1	1	2	0				24	38	60	0
2	2	1	2	0	1	1	1	29	34	70	1	3
0	2	1	3	0	1	1	1	26	45	70	1	3
2	1	1	3	0	1	1	1	36	40	60	1	3
3	1	3	1	0				39	40	60	0
2	1	1	2	0				38	72	40	0
1	1	1	2	0	0	0	1	19	21	80	1	1
3	2	3	2	0				16	29	80	0
1	1	1	1	0				22	22	60	0
0	1	3	1	0				19	32	70	0
3	1	2	2	0				20	28	70	0
3	1	1	1	0				33	44	50	0
2	2	2	2	0				22	37	70	0
2	1	1	1	0				20	46	30	0

## Sheet: codebook
	agecat1	sex	marriage1	education1	work1
0	18-35				unemployed
1	36-45	male	single	primary and below	employed
2	46-59	female	married/cohabited	middle and high school
3	60-100		divorced/separated/widowed	college and above
